# Supplementary material for: Substrate and cofactor binding to nitrile reductase: a mass spectrometry based study
Source: Royal Society of Chemistry journal article supplement (doi:10.1039/c6cy01140c), 2016-01-01

**Substrate and cofactor binding to nitrile reductase: a mass spectrometry based study**

Lorina Gjonaj,<sup>a</sup> Martijn Pinkse,<sup>b</sup> Elena Fernández-Fueyo,<sup>a</sup> Frank Hollmann<sup>a</sup> and Ulf Hanefeld\*<sup>a</sup>

- [a] Gebouw voor Scheikunde, Biokatalyse, Afdeling Biotechnologie, Technische Universiteit Delft, Julianalaan 136, 2628BL Delft, The Netherlands  
E-mail: U.Hanefeld@tudelft.nl
- [b] Analytische Biotechnologie, Afdeling Biotechnologie, Technische Universiteit Delft, Julianalaan 67, 2628BC Delft, The Netherlands
-

## Supporting information

### Kinetic measurements:

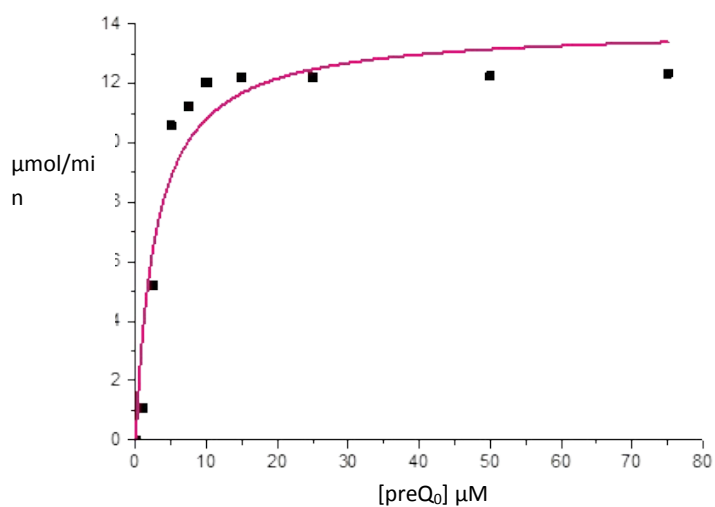

**Figure S1.** Michaelis-Menten curve

In order to determine the  $K_m$  for PreQ<sub>0</sub>, the concentration of the cofactor was kept constant at 100 μM, while changing the substrate concentration from 1-75 μM. Error margins or standard deviation 5-8%.

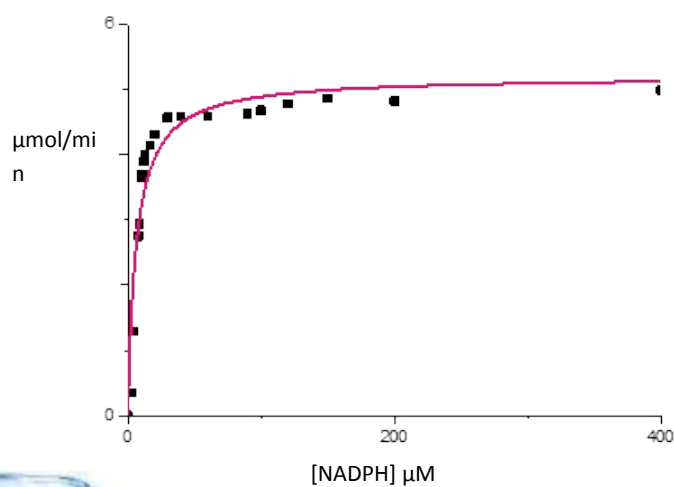

**Figure S2.** Michaelis-Menten curve

In order to determine the  $K_m$  for NADPH, the concentration of PreQ<sub>0</sub> was kept constant at 50 μM, while changing the cofactor concentration from 1-400 μM. Error margins Standard deviation 5-8%.

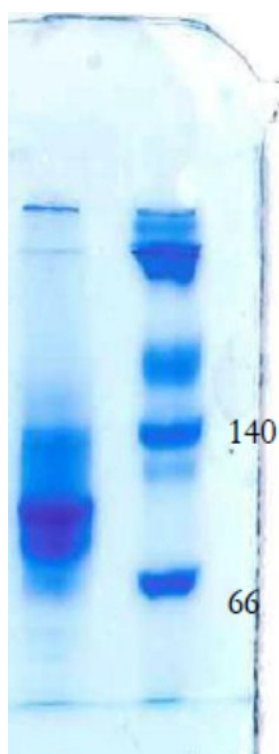

**Figure S3.** Native gel electrophoresis

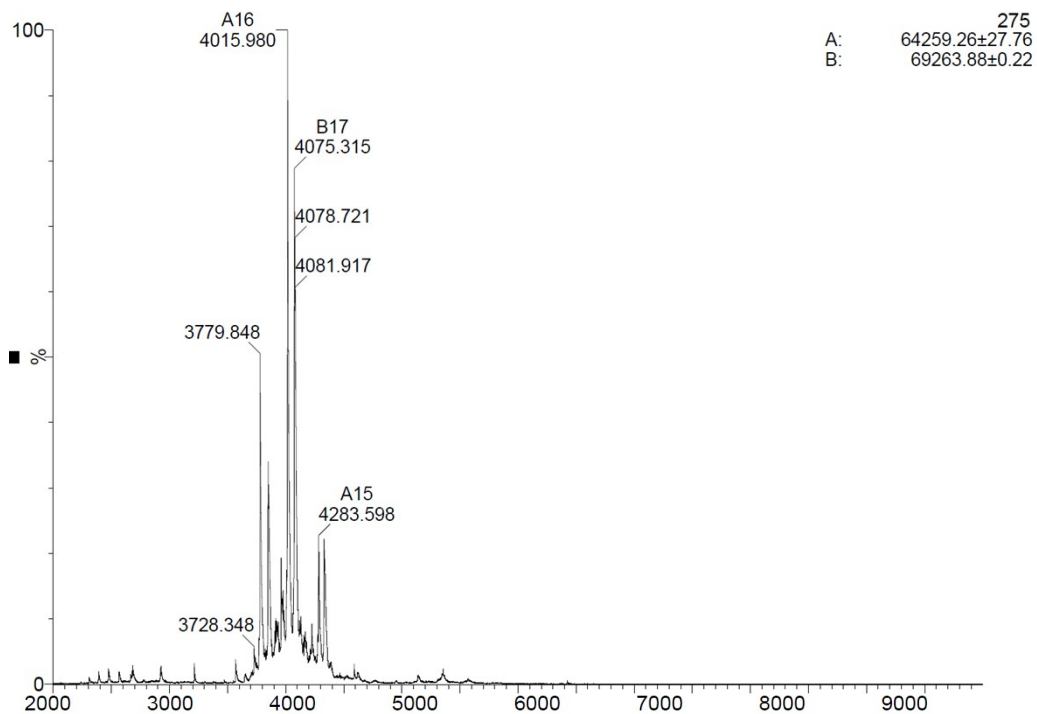

**Figure S4.** Mass spectra of free EcoNR, A16 multiple charge ion ( $z=16^+$ ) of dimeric EcoNR- 2 tags, B17 multiple charge ion ( $z =17^+$ ) of dimeric EcoNR-1 tag.

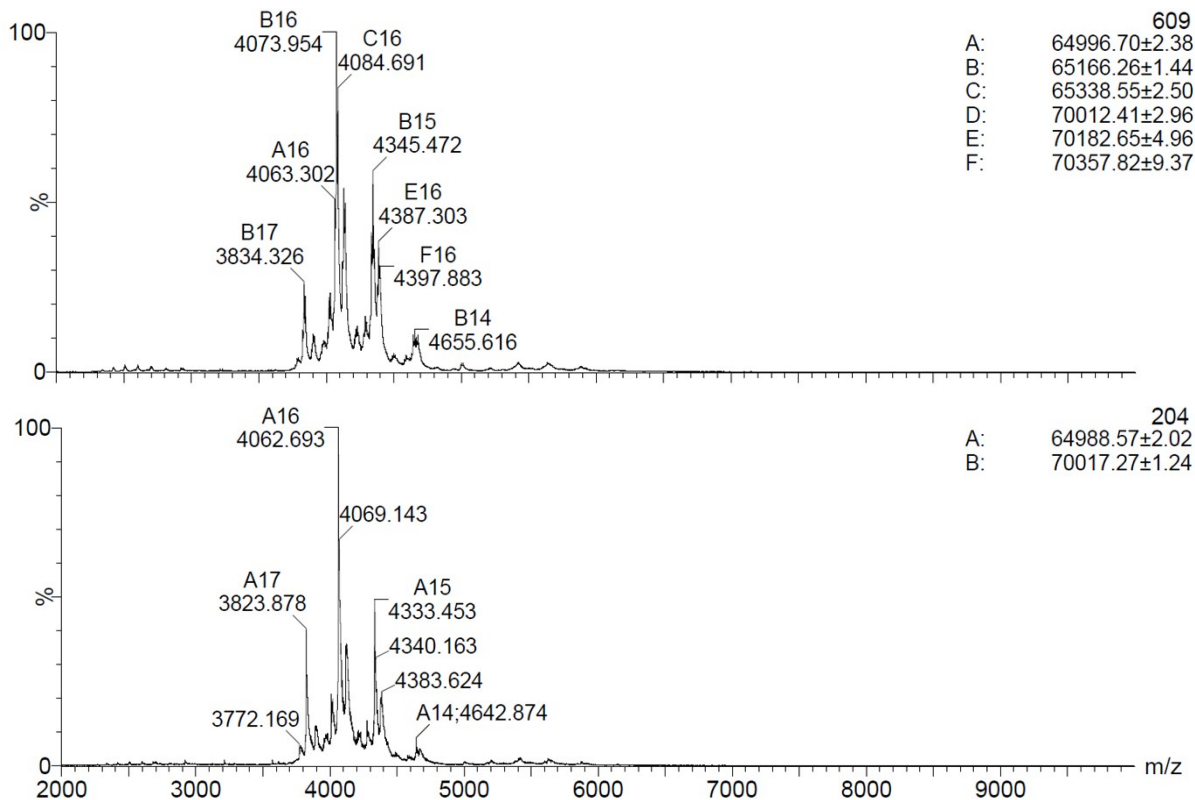

**Figure S5.** A) *EcoNR* treated with one equivalent of PreQ<sub>0</sub> and NADPH each per monomer B) The mass peak  $m/z=4063$  is correlated to the mass of the dimeric *EcoNR* +NADPH when an excess of cofactor was used.

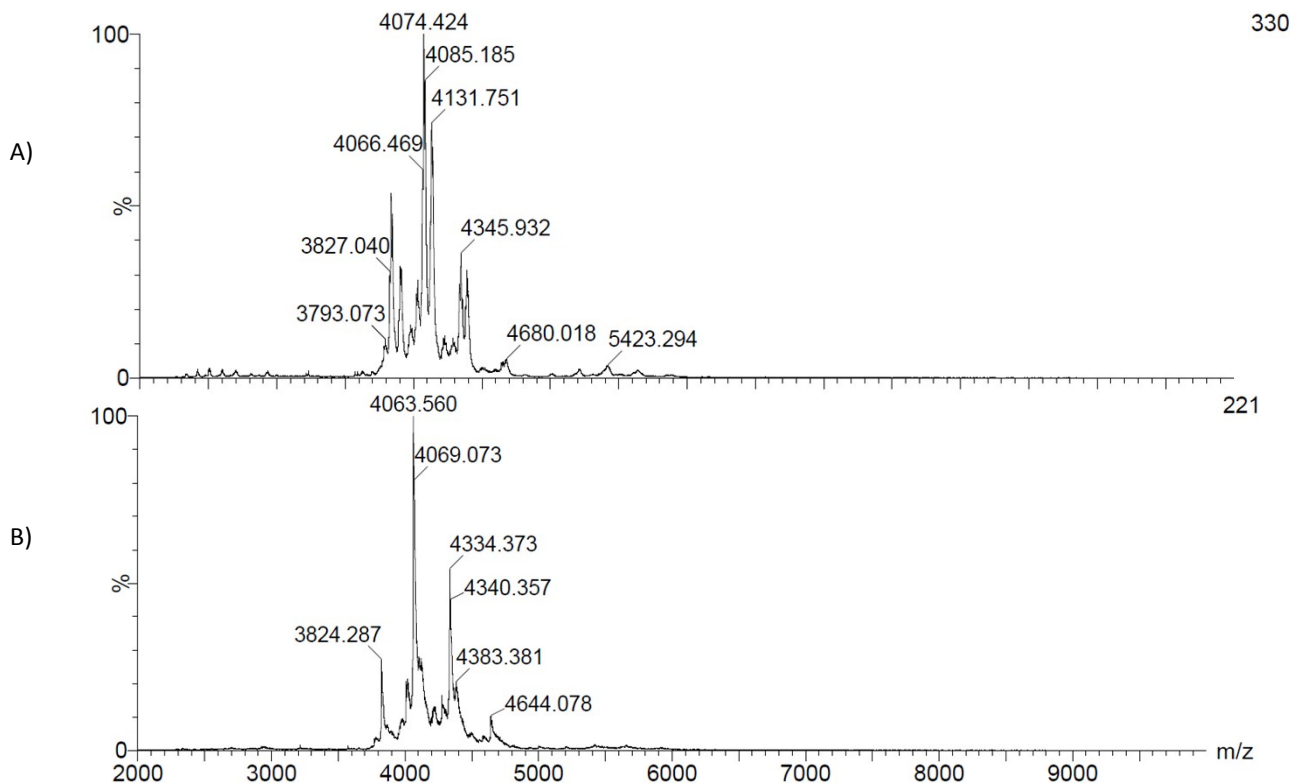

**Figure S6.** A) *EcoNR* treated with one equivalent of NADPH and PreQ<sub>0</sub> each per monomer B) The mass peak  $m/z=4063$  is correlated to the mass of the dimeric *EcoNR* +NADPH when an excess of cofactor was used.

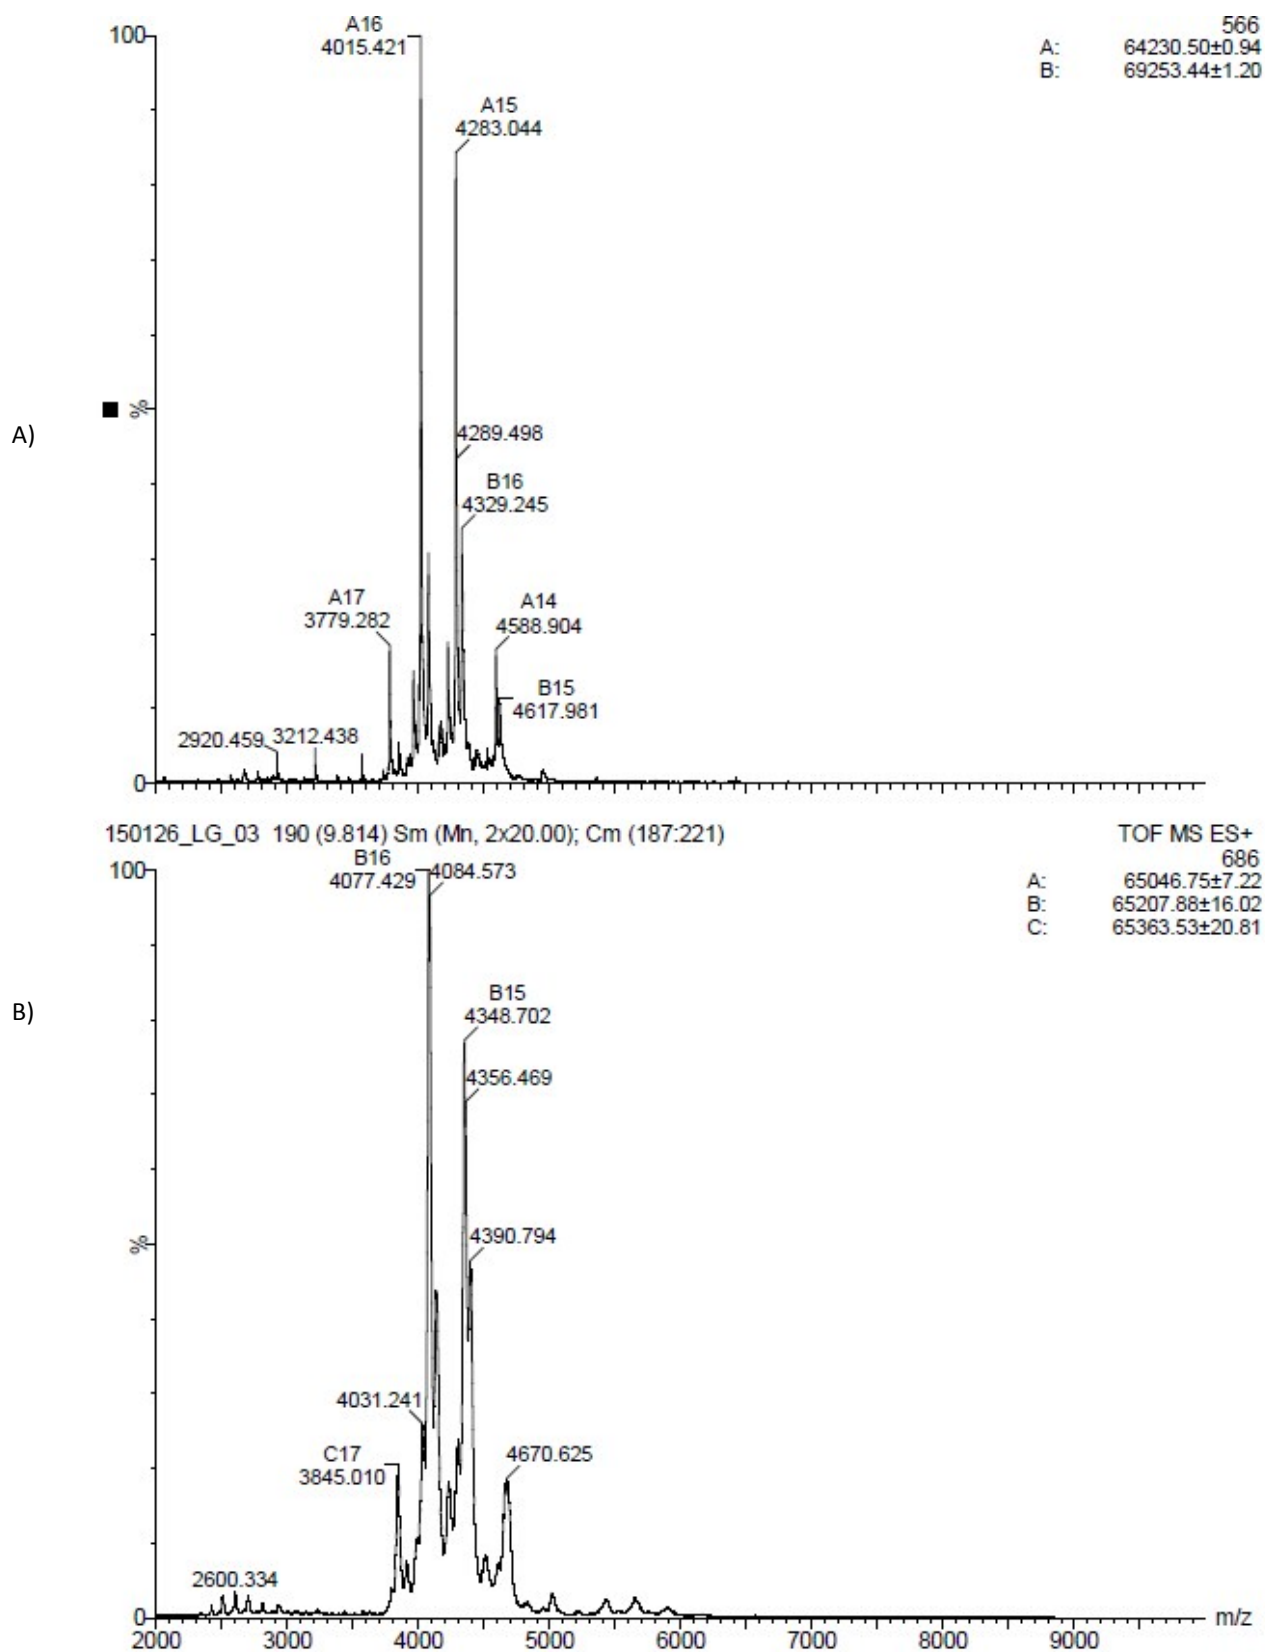

**Figure S7.** A) *EcoNR* with AMP and B) followed by the equimolar addition of PreQ<sub>0</sub> and NADPH.

NMR spectrum was recorded on a Bruker Avance spectrometer at 400 MHz ( $^1\text{H}$ ) at room temperature.

$^1\text{H}$  NMR in  $\text{DMSO-d}_6$

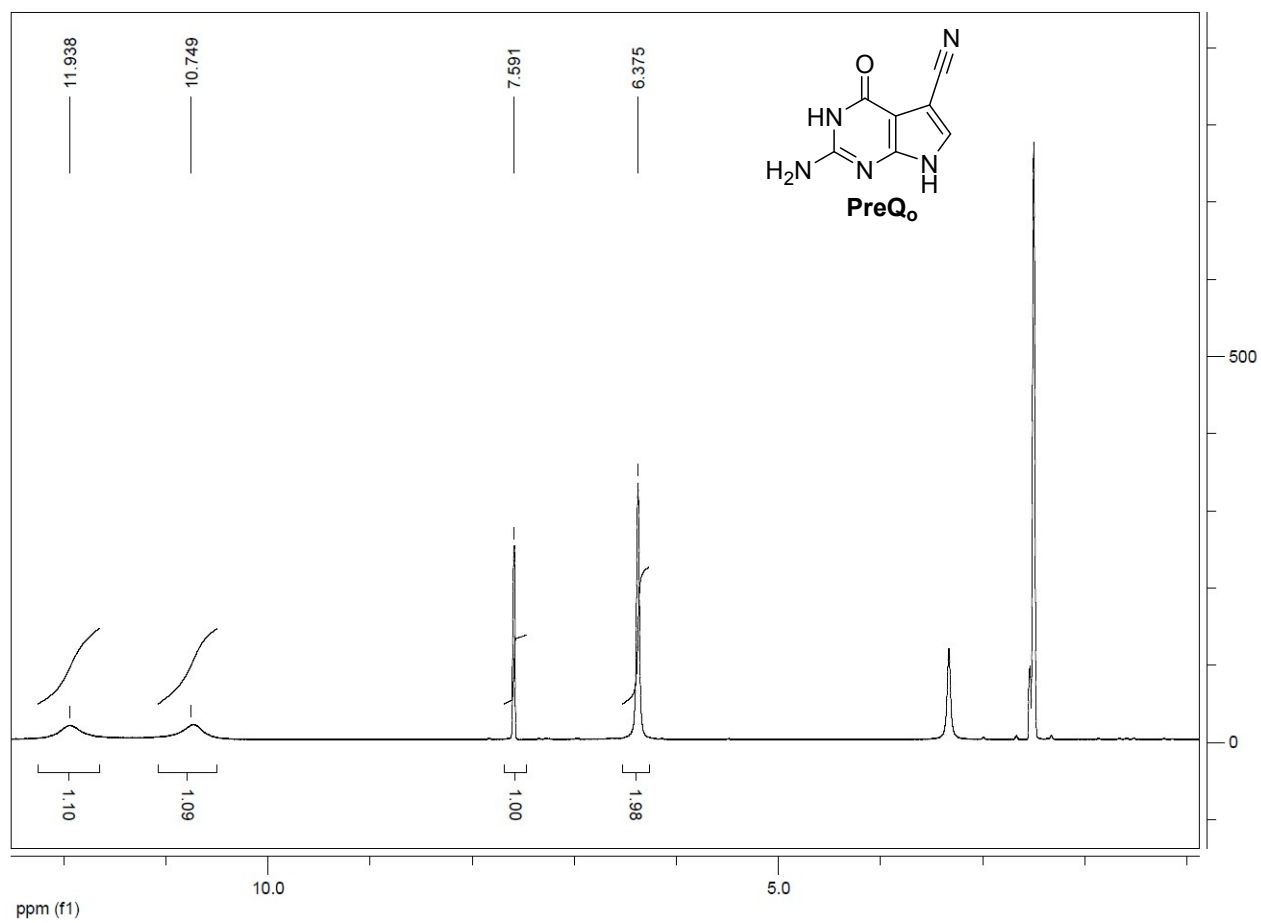

Supplement: c6cy01140c1.pdf [file c6cy01140c1.pdf]
